# Supplementary material for: Tropospheric column ozone: matching individual profiles from Aura OMI and TES with a chemistry-transport model
Source: Copernicus journal article supplement (doi:10.5194/acp-12-10441-2012), 2012-11-08
Supplement: Supplementary file 1 [file acp-12-10441-2012-supplement.pdf]

# **Supplemental Material: Tropospheric column ozone: Matching individual profiles from Aura OMI and TES with a chemistry-transport model**

**Q. Tang<sup>1,2</sup> and M. J. Prather<sup>1</sup>**

<sup>1</sup>Department of Earth System Science, University of California, Irvine, California, 92697, USA

<sup>2</sup>Department of Biological and Environmental Engineering, Cornell University, Ithaca, New York, 14853, USA

Correspondence to: Q. Tang (qtang@cornell.edu)

**Table S1.** Monthly means ( $\mu$ ), biases, and standard deviations ( $\sigma$ ) of CTM vs. OMI TCO (unit: DU) on  $5^\circ \times 5^\circ$  grids over NH mid-latitudes ( $35^\circ \text{ N} < \text{Lat} \leq 60^\circ \text{ N}$ ) for years 2005–2006<sup>a</sup>

| Year/Month | $\mu_{OMI}$ | $\mu_{(CTM-OMI)}$ | $\sigma_{CTM}$ | $\sigma_{OMI}$ | $\sigma_{(CTM-OMI)}$ | $\sigma^*_{CTM}$ | $\sigma^*_{OMI}$ | $\sigma^*_{(CTM-OMI)}$ |
|------------|-------------|-------------------|----------------|----------------|----------------------|------------------|------------------|------------------------|
| 2005/01    | 31.2        | +1.7              | 5.0            | 6.0            | 3.2                  | 4.6              | 5.4              | 3.0                    |
| 2005/02    | 34.0        | +1.8              | 5.4            | 6.7            | 3.9                  | 4.9              | 6.0              | 3.6                    |
| 2005/03    | 38.3        | +2.1              | 5.5            | 6.7            | 4.1                  | 4.9              | 6.2              | 3.9                    |
| 2005/04    | 44.0        | +1.1              | 6.2            | 7.7            | 4.9                  | 5.5              | 7.2              | 4.7                    |
| 2005/05    | 47.7        | +0.7              | 5.6            | 7.4            | 5.1                  | 4.6              | 6.6              | 4.9                    |
| 2005/06    | 51.3        | -1.2              | 5.6            | 8.2            | 5.7                  | 4.6              | 7.1              | 5.3                    |
| 2005/07    | 52.7        | -4.1              | 5.2            | 8.2            | 5.9                  | 4.5              | 6.8              | 5.3                    |
| 2005/08    | 49.0        | -3.6              | 5.0            | 7.3            | 4.8                  | 4.0              | 6.1              | 4.4                    |
| 2005/09    | 43.2        | -2.2              | 5.3            | 6.7            | 4.0                  | 4.1              | 5.8              | 3.8                    |
| 2005/10    | 37.8        | -0.8              | 5.3            | 6.6            | 3.9                  | 4.4              | 5.8              | 3.7                    |
| 2005/11    | 32.8        | +0.5              | 4.7            | 6.0            | 3.5                  | 4.2              | 5.2              | 3.1                    |
| 2005/12    | 30.0        | +2.1              | 4.7            | 5.1            | 2.9                  | 4.3              | 4.5              | 2.6                    |
| 2006/01    | 31.1        | +3.2              | 5.7            | 6.3            | 3.8                  | 5.3              | 5.6              | 3.4                    |
| 2006/02    | 34.0        | +4.7              | 6.1            | 6.5            | 4.3                  | 5.7              | 6.1              | 4.0                    |
| 2006/03    | 39.2        | +5.1              | 7.4            | 7.9            | 4.8                  | 6.9              | 7.5              | 4.6                    |
| 2006/04    | 44.3        | +4.1              | 6.7            | 7.7            | 5.0                  | 5.8              | 7.0              | 4.8                    |
| 2006/05    | 48.0        | +2.3              | 6.1            | 7.6            | 5.6                  | 5.1              | 6.8              | 5.3                    |
| 2006/06    | 52.1        | -0.7              | 5.8            | 8.1            | 6.0                  | 4.7              | 7.0              | 5.6                    |
| 2006/07    | 52.7        | -4.0              | 5.2            | 7.9            | 5.5                  | 4.3              | 6.7              | 5.1                    |
| 2006/08    | 49.9        | -4.5              | 4.7            | 7.4            | 4.9                  | 3.7              | 5.9              | 4.3                    |
| 2006/09    | 43.7        | -2.3              | 4.6            | 6.5            | 3.9                  | 3.8              | 5.7              | 3.8                    |
| 2006/10    | 37.7        | -0.9              | 4.2            | 5.7            | 3.4                  | 3.5              | 5.0              | 3.3                    |
| 2006/11    | 33.5        | +0.1              | 4.3            | 5.6            | 3.1                  | 3.8              | 5.0              | 2.9                    |
| 2006/12    | 30.6        | +0.9              | 4.6            | 5.8            | 3.0                  | 4.2              | 5.1              | 2.7                    |

<sup>a</sup> $\sigma$  and  $\sigma^*$  denote for the standard deviations relative to the regional mean for the latitude band and the  $5^\circ \times 5^\circ$  local means, respectively.

**Table S2.** Same as Table S1 for CTM vs. TES TCO

| Year/Month <sup>a</sup> | $\mu_{TES}$ | $\mu_{(CTM-TES)}$ | $\sigma_{CTM}$ | $\sigma_{TES}$ | $\sigma_{(CTM-TES)}$ | $\sigma_{CTM}^*$ | $\sigma_{TES}^*$ | $\sigma_{(CTM-TES)}^*$ |
|-------------------------|-------------|-------------------|----------------|----------------|----------------------|------------------|------------------|------------------------|
| 2005/01                 | 34.7        | +1.4              | 4.5            | 6.0            | 4.9                  | 3.4              | 4.9              | 4.2                    |
| 2005/02                 | 35.7        | +1.9              | 4.6            | 6.3            | 4.9                  | 3.2              | 5.0              | 4.3                    |
| 2005/03                 | 38.3        | +1.9              | 4.8            | 6.4            | 5.0                  | 3.3              | 5.1              | 4.5                    |
| 2005/04                 | 40.3        | +1.3              | 4.8            | 6.9            | 5.1                  | 2.6              | 4.3              | 3.7                    |
| 2005/05                 | 43.8        | +2.0              | 5.4            | 6.8            | 5.5                  | 3.1              | 4.9              | 4.5                    |
| 2005/07                 | 47.1        | -0.8              | 7.3            | 8.9            | 5.7                  | 4.9              | 6.9              | 5.3                    |
| 2005/08                 | 45.3        | -0.5              | 6.5            | 8.1            | 5.3                  | 4.6              | 6.5              | 5.0                    |
| 2005/09                 | 43.4        | -0.3              | 5.5            | 6.9            | 5.0                  | 3.9              | 5.3              | 4.3                    |
| 2005/10                 | 39.2        | -0.3              | 5.3            | 6.4            | 4.4                  | 4.1              | 5.4              | 4.1                    |
| 2005/11                 | 36.1        | -0.3              | 4.8            | 5.8            | 4.3                  | 3.6              | 4.7              | 4.0                    |
| 2005/12                 | 34.1        | +0.7              | 4.5            | 5.6            | 4.2                  | 3.3              | 4.6              | 3.8                    |
| 2006/01                 | 34.3        | +2.5              | 4.7            | 5.8            | 4.5                  | 3.8              | 5.0              | 4.2                    |
| 2006/02                 | 34.9        | +4.0              | 5.1            | 6.2            | 5.0                  | 4.1              | 5.3              | 4.6                    |
| 2006/03                 | 38.0        | +4.8              | 6.0            | 7.1            | 5.5                  | 4.9              | 6.1              | 5.2                    |
| 2006/04                 | 40.5        | +5.2              | 5.9            | 7.2            | 5.5                  | 4.6              | 6.2              | 5.3                    |
| 2006/05                 | 43.1        | +4.2              | 5.9            | 7.5            | 6.1                  | 4.6              | 6.5              | 5.9                    |
| 2006/06                 | 45.5        | +2.6              | 7.0            | 8.5            | 6.2                  | 5.2              | 7.0              | 5.9                    |
| 2006/07                 | 46.6        | +0.1              | 7.7            | 9.2            | 5.8                  | 5.5              | 7.1              | 5.5                    |
| 2006/08                 | 46.1        | -0.8              | 6.6            | 8.3            | 5.6                  | 4.4              | 6.4              | 5.2                    |
| 2006/09                 | 41.3        | +0.5              | 5.3            | 6.5            | 4.8                  | 4.0              | 5.4              | 4.4                    |
| 2006/10                 | 38.2        | +0.6              | 4.9            | 6.0            | 4.5                  | 3.7              | 5.0              | 4.2                    |
| 2006/11                 | 36.3        | +0.1              | 4.6            | 5.6            | 4.3                  | 3.5              | 4.7              | 4.1                    |
| 2006/12                 | 34.5        | +0.4              | 4.7            | 5.5            | 4.6                  | 3.7              | 4.7              | 4.3                    |

<sup>a</sup>TES has no data for June 2005.

**Table S3.** Same as Table S1 for OMI vs. TES TCO

| Year/Month | $\mu_{TES}$ | $\mu_{(OMI-TES)}$ | $\sigma_{OMI}$ | $\sigma_{TES}$ | $\sigma_{(OMI-TES)}$ | $\sigma_{OMI}^*$ | $\sigma_{TES}^*$ | $\sigma_{(OMI-TES)}^*$ |
|------------|-------------|-------------------|----------------|----------------|----------------------|------------------|------------------|------------------------|
| 2005/01    | 33.8        | -2.4              | 5.6            | 5.7            | 5.8                  | 4.2              | 4.1              | 4.4                    |
| 2005/02    | 35.4        | -1.3              | 6.1            | 6.2            | 6.2                  | 4.2              | 4.2              | 4.6                    |
| 2005/03    | 38.1        | +0.5              | 6.2            | 6.5            | 5.9                  | 4.5              | 4.3              | 4.4                    |
| 2005/04    | 40.2        | +2.5              | 7.2            | 6.8            | 6.6                  | 3.1              | 3.5              | 3.2                    |
| 2005/05    | 44.2        | +5.8              | 6.4            | 6.4            | 7.0                  | 4.0              | 4.4              | 4.7                    |
| 2005/07    | 47.5        | +5.3              | 7.3            | 9.1            | 7.6                  | 5.5              | 6.6              | 5.7                    |
| 2005/08    | 45.0        | +3.7              | 6.7            | 8.0            | 6.6                  | 5.1              | 6.1              | 5.1                    |
| 2005/09    | 43.6        | +0.9              | 6.1            | 6.6            | 5.9                  | 3.8              | 4.4              | 4.2                    |
| 2005/10    | 38.8        | -2.2              | 5.6            | 6.1            | 5.6                  | 4.4              | 4.8              | 4.9                    |
| 2005/11    | 35.7        | -3.4              | 5.1            | 5.7            | 5.3                  | 3.9              | 4.4              | 4.4                    |
| 2005/12    | 33.9        | -3.7              | 4.9            | 5.5            | 5.2                  | 3.7              | 4.2              | 4.1                    |
| 2006/01    | 33.9        | -2.8              | 5.7            | 5.6            | 5.6                  | 4.6              | 4.7              | 4.7                    |
| 2006/02    | 34.8        | -0.8              | 6.1            | 5.9            | 6.1                  | 5.0              | 4.7              | 5.1                    |
| 2006/03    | 38.0        | +0.9              | 7.6            | 7.1            | 7.3                  | 6.2              | 5.8              | 6.3                    |
| 2006/04    | 40.5        | +3.2              | 7.3            | 6.9            | 7.0                  | 5.9              | 5.6              | 6.1                    |
| 2006/05    | 43.3        | +4.4              | 7.2            | 7.2            | 7.6                  | 5.6              | 6.1              | 6.5                    |
| 2006/06    | 45.6        | +6.0              | 7.6            | 8.3            | 7.9                  | 5.9              | 6.5              | 6.2                    |
| 2006/07    | 46.6        | +5.8              | 7.5            | 9.1            | 7.9                  | 5.7              | 6.8              | 5.8                    |
| 2006/08    | 46.2        | +3.5              | 6.8            | 8.2            | 6.6                  | 4.9              | 6.1              | 5.2                    |
| 2006/09    | 41.4        | +0.6              | 5.4            | 6.3            | 5.8                  | 4.0              | 4.9              | 4.7                    |
| 2006/10    | 38.0        | -1.5              | 4.8            | 5.8            | 5.7                  | 3.9              | 4.6              | 4.9                    |
| 2006/11    | 36.0        | -2.8              | 4.9            | 5.4            | 5.3                  | 3.9              | 4.3              | 4.5                    |
| 2006/12    | 34.3        | -3.8              | 5.3            | 5.4            | 5.5                  | 4.3              | 4.4              | 4.7                    |

**Table S4.** Same as Table S1 for OMI vs. TES\* TCO<sup>a</sup>

| Year/Month | $\mu_{TES^*}$ | $\mu_{(OMI-TES^*)}$ <sup>b</sup> | $\sigma_{OMI}$ | $\sigma_{TES^*}$ | $\sigma_{(OMI-TES^*)}$ | $\sigma_{OMI}^*$ | $\sigma_{TES^*}^*$ | $\sigma_{(OMI-TES^*)}^*$ |
|------------|---------------|----------------------------------|----------------|------------------|------------------------|------------------|--------------------|--------------------------|
| 2005/01    | 30.0          | +1.4 (+0.4)                      | 5.6            | 5.1              | 5.4                    | 4.2              | 3.9                | 4.2                      |
| 2005/02    | 32.9          | +1.3 (+0.3)                      | 6.1            | 6.1              | 5.9                    | 4.2              | 4.2                | 4.5                      |
| 2005/03    | 37.1          | +1.6 (-0.2)                      | 6.2            | 6.4              | 5.5                    | 4.5              | 4.5                | 4.1                      |
| 2005/04    | 40.6          | +2.1 (+0.3)                      | 7.2            | 6.9              | 6.5                    | 3.1              | 3.6                | 3.2                      |
| 2005/05    | 45.7          | +4.3 (+2.4)                      | 6.4            | 6.4              | 7.1                    | 4.0              | 4.4                | 4.7                      |
| 2005/07    | 48.3          | +4.5 (+3.8)                      | 7.3            | 8.3              | 6.6                    | 5.5              | 6.4                | 5.6                      |
| 2005/08    | 44.2          | +4.5 (+3.4)                      | 6.7            | 7.5              | 5.9                    | 5.1              | 5.9                | 5.0                      |
| 2005/09    | 41.3          | +3.2 (+2.0)                      | 6.1            | 6.3              | 5.3                    | 3.8              | 4.1                | 3.9                      |
| 2005/10    | 34.6          | +2.0 (-0.2)                      | 5.6            | 5.5              | 4.9                    | 4.4              | 4.3                | 4.3                      |
| 2005/11    | 31.0          | +1.3 (-0.9)                      | 5.1            | 5.0              | 4.9                    | 3.9              | 4.1                | 4.2                      |
| 2005/12    | 29.3          | +1.0 (-1.4)                      | 4.9            | 4.7              | 4.8                    | 3.7              | 3.8                | 4.0                      |
| 2006/01    | 29.8          | +1.3 (-0.8)                      | 5.7            | 5.1              | 5.1                    | 4.6              | 4.4                | 4.5                      |
| 2006/02    | 31.8          | +2.1 (-1.1)                      | 6.1            | 5.7              | 5.7                    | 5.0              | 4.7                | 4.8                      |
| 2006/03    | 36.7          | +2.2 (-0.6)                      | 7.6            | 7.0              | 6.9                    | 6.2              | 5.9                | 6.0                      |
| 2006/04    | 41.0          | +2.6 (+0.5)                      | 7.3            | 7.0              | 6.7                    | 5.9              | 5.8                | 5.8                      |
| 2006/05    | 44.5          | +3.1 (+1.3)                      | 7.2            | 7.2              | 7.4                    | 5.6              | 6.2                | 6.5                      |
| 2006/06    | 47.4          | +4.2 (+2.9)                      | 7.6            | 8.0              | 7.5                    | 5.9              | 6.5                | 6.4                      |
| 2006/07    | 47.6          | +4.8 (+4.2)                      | 7.5            | 8.2              | 7.0                    | 5.7              | 6.6                | 5.8                      |
| 2006/08    | 45.7          | +4.0 (+3.6)                      | 6.8            | 7.7              | 6.0                    | 4.9              | 6.0                | 5.1                      |
| 2006/09    | 39.0          | +3.0 (+1.8)                      | 5.4            | 5.9              | 5.4                    | 4.0              | 4.7                | 4.4                      |
| 2006/10    | 34.6          | +1.9 (+0.5)                      | 4.8            | 5.4              | 5.2                    | 3.9              | 4.4                | 4.6                      |
| 2006/11    | 31.7          | +1.5 (-0.0)                      | 4.9            | 4.9              | 5.0                    | 3.9              | 4.0                | 4.4                      |
| 2006/12    | 29.8          | +0.8 (-0.5)                      | 5.3            | 4.9              | 5.5                    | 4.3              | 4.2                | 4.8                      |

<sup>a</sup>TES\* represents for the TES data processed with the OMI a priori.

<sup>b</sup>Values in parentheses show the mean OMI-TES bias referring to the CTM calculated by Eq. 9.

**Table S5.** Same as Table S1 for NH jet ( $25^\circ \text{N} < \text{Lat} < 35^\circ \text{N}$ )

| Year/Month | $\mu_{OMI}$ | $\mu_{(CTM-OMI)}$ | $\sigma_{CTM}$ | $\sigma_{OMI}$ | $\sigma_{(CTM-OMI)}$ | $\sigma_{CTM}^*$ | $\sigma_{OMI}^*$ | $\sigma_{(CTM-OMI)}^*$ |
|------------|-------------|-------------------|----------------|----------------|----------------------|------------------|------------------|------------------------|
| 2005/01    | 37.8        | +0.1              | 6.0            | 7.6            | 4.5                  | 5.5              | 6.9              | 4.3                    |
| 2005/02    | 39.0        | +0.1              | 6.0            | 7.9            | 4.8                  | 5.4              | 6.9              | 4.3                    |
| 2005/03    | 41.7        | -0.1              | 6.8            | 8.2            | 5.4                  | 6.4              | 7.6              | 5.0                    |
| 2005/04    | 49.5        | -2.4              | 7.2            | 9.4            | 6.2                  | 6.6              | 8.7              | 5.8                    |
| 2005/05    | 52.6        | -3.4              | 6.2            | 8.1            | 6.1                  | 5.7              | 7.3              | 5.7                    |
| 2005/06    | 51.8        | -3.9              | 5.9            | 8.0            | 5.7                  | 4.8              | 6.6              | 5.3                    |
| 2005/07    | 47.0        | -3.6              | 5.7            | 7.7            | 4.9                  | 3.9              | 5.5              | 4.3                    |
| 2005/08    | 44.1        | -1.5              | 5.1            | 6.6            | 4.8                  | 3.5              | 4.7              | 4.0                    |
| 2005/09    | 41.9        | -0.5              | 4.5            | 5.5            | 4.3                  | 3.4              | 4.4              | 3.8                    |
| 2005/10    | 40.2        | -0.3              | 4.9            | 5.2            | 4.5                  | 3.8              | 4.6              | 4.0                    |
| 2005/11    | 37.1        | -1.0              | 4.9            | 5.6            | 3.9                  | 4.0              | 5.0              | 3.7                    |
| 2005/12    | 36.2        | -0.8              | 4.5            | 6.2            | 4.4                  | 4.0              | 5.5              | 4.1                    |
| 2006/01    | 37.4        | +0.1              | 5.7            | 7.6            | 5.3                  | 5.3              | 6.8              | 5.0                    |
| 2006/02    | 36.3        | +1.8              | 6.2            | 6.9            | 5.7                  | 5.6              | 6.4              | 5.4                    |
| 2006/03    | 41.2        | +2.0              | 7.7            | 8.3            | 5.9                  | 7.0              | 7.5              | 5.5                    |
| 2006/04    | 47.8        | +1.1              | 7.9            | 8.5            | 6.8                  | 7.0              | 7.6              | 6.2                    |
| 2006/05    | 52.6        | -1.5              | 6.6            | 7.6            | 6.6                  | 6.0              | 6.9              | 6.2                    |
| 2006/06    | 50.6        | -3.0              | 5.8            | 7.3            | 5.3                  | 4.5              | 6.0              | 5.1                    |
| 2006/07    | 46.6        | -3.9              | 5.4            | 7.3            | 4.4                  | 3.7              | 5.2              | 4.0                    |
| 2006/08    | 43.9        | -4.0              | 4.8            | 6.9            | 4.3                  | 3.2              | 4.8              | 3.7                    |
| 2006/09    | 41.1        | -2.5              | 4.1            | 5.4            | 3.6                  | 3.0              | 4.3              | 3.3                    |
| 2006/10    | 39.6        | -1.8              | 4.0            | 5.0            | 3.5                  | 3.0              | 4.4              | 3.3                    |
| 2006/11    | 37.1        | -1.3              | 4.0            | 5.3            | 3.6                  | 3.5              | 4.8              | 3.4                    |
| 2006/12    | 37.3        | -1.3              | 4.5            | 6.7            | 4.5                  | 4.0              | 5.9              | 4.2                    |

**Table S6.** Same as Table S1 for CTM vs. TES over NH jet ( $25^\circ \text{N} < \text{Lat} \leq 35^\circ \text{N}$ )

| Year/Month | $\mu_{TES}$ | $\mu_{(CTM-TES)}$ | $\sigma_{CTM}$ | $\sigma_{TES}$ | $\sigma_{(CTM-TES)}$ | $\sigma_{CTM}^*$ | $\sigma_{TES}^*$ | $\sigma_{(CTM-TES)}^*$ |
|------------|-------------|-------------------|----------------|----------------|----------------------|------------------|------------------|------------------------|
| 2005/01    | 35.9        | +3.5              | 7.1            | 7.6            | 4.8                  | 5.1              | 5.7              | 4.1                    |
| 2005/02    | 36.7        | +3.1              | 7.2            | 8.3            | 5.3                  | 5.3              | 6.2              | 4.4                    |
| 2005/03    | 38.7        | +2.2              | 8.1            | 8.4            | 5.5                  | 6.3              | 6.3              | 4.7                    |
| 2005/04    | 42.6        | +0.6              | 7.4            | 8.3            | 4.9                  | 4.3              | 4.7              | 3.4                    |
| 2005/05    | 43.4        | +1.4              | 7.8            | 8.4            | 5.7                  | 4.8              | 5.8              | 4.5                    |
| 2005/07    | 44.0        | -0.2              | 8.4            | 9.8            | 5.5                  | 4.6              | 6.2              | 4.7                    |
| 2005/08    | 41.7        | +0.8              | 7.8            | 8.9            | 5.6                  | 4.5              | 5.6              | 4.4                    |
| 2005/09    | 41.0        | +1.0              | 7.0            | 7.8            | 5.1                  | 4.1              | 4.8              | 3.8                    |
| 2005/10    | 38.9        | +0.8              | 5.9            | 6.7            | 4.5                  | 4.2              | 5.3              | 4.2                    |
| 2005/11    | 36.8        | +1.3              | 5.8            | 6.8            | 4.4                  | 3.8              | 5.0              | 4.0                    |
| 2005/12    | 34.6        | +1.9              | 5.5            | 6.6            | 4.3                  | 3.8              | 5.1              | 3.9                    |
| 2006/01    | 35.7        | +3.5              | 7.0            | 7.6            | 4.8                  | 5.2              | 5.9              | 4.4                    |
| 2006/02    | 35.2        | +5.0              | 7.3            | 7.8            | 5.5                  | 5.6              | 6.3              | 5.0                    |
| 2006/03    | 37.1        | +6.3              | 8.7            | 8.3            | 5.3                  | 6.7              | 6.2              | 4.9                    |
| 2006/04    | 40.7        | +5.8              | 8.8            | 9.2            | 5.9                  | 7.2              | 7.2              | 5.5                    |
| 2006/05    | 43.6        | +3.9              | 8.9            | 8.8            | 6.2                  | 7.2              | 7.2              | 5.8                    |
| 2006/06    | 43.4        | +2.0              | 8.5            | 9.3            | 5.4                  | 5.6              | 6.4              | 5.0                    |
| 2006/07    | 43.7        | +0.9              | 8.1            | 9.2            | 5.2                  | 4.3              | 6.0              | 4.6                    |
| 2006/08    | 42.5        | -0.1              | 8.0            | 9.6            | 5.7                  | 4.6              | 6.2              | 4.6                    |
| 2006/09    | 39.7        | +1.3              | 6.5            | 7.3            | 4.7                  | 4.4              | 5.1              | 4.0                    |
| 2006/10    | 38.0        | +1.5              | 6.1            | 7.2            | 4.6                  | 4.4              | 5.8              | 4.4                    |
| 2006/11    | 36.6        | +1.5              | 6.0            | 6.8            | 4.4                  | 4.2              | 5.2              | 4.0                    |
| 2006/12    | 36.2        | +1.9              | 6.2            | 6.9            | 4.3                  | 4.4              | 5.2              | 4.0                    |

**Table S7.** Same as Table S1 for OMI vs. TES over NH jet ( $25^{\circ} \text{ N} < \text{Lat} \leq 35^{\circ} \text{ N}$ )

| Year/Month | $\mu_{TES}$ | $\mu_{(OMI-TES)}$ | $\sigma_{OMI}$ | $\sigma_{TES}$ | $\sigma_{(OMI-TES)}$ | $\sigma_{OMI}^*$ | $\sigma_{TES}^*$ | $\sigma_{(OMI-TES)}^*$ |
|------------|-------------|-------------------|----------------|----------------|----------------------|------------------|------------------|------------------------|
| 2005/01    | 36.7        | +0.6              | 6.5            | 6.1            | 5.1                  | 4.2              | 4.3              | 3.5                    |
| 2005/02    | 37.3        | +1.0              | 6.7            | 6.8            | 5.4                  | 4.3              | 4.7              | 3.8                    |
| 2005/03    | 40.3        | +0.5              | 6.9            | 7.1            | 5.1                  | 4.8              | 5.0              | 3.7                    |
| 2005/04    | 44.0        | +2.6              | 6.6            | 6.3            | 6.1                  | 2.7              | 2.9              | 2.2                    |
| 2005/05    | 45.0        | +8.5              | 7.5            | 7.0            | 6.5                  | 4.7              | 4.7              | 3.8                    |
| 2005/07    | 45.1        | +2.6              | 7.4            | 9.8            | 8.0                  | 4.2              | 5.6              | 5.3                    |
| 2005/08    | 42.4        | +1.7              | 6.1            | 8.4            | 6.7                  | 3.3              | 5.1              | 4.5                    |
| 2005/09    | 42.3        | -0.9              | 4.5            | 7.3            | 6.0                  | 2.3              | 3.9              | 3.5                    |
| 2005/10    | 39.9        | -1.4              | 4.4            | 6.2            | 4.8                  | 3.3              | 4.8              | 4.0                    |
| 2005/11    | 37.5        | -2.6              | 4.8            | 6.1            | 4.8                  | 3.4              | 4.4              | 4.0                    |
| 2005/12    | 35.3        | -1.4              | 5.3            | 5.5            | 5.0                  | 4.0              | 4.4              | 4.0                    |
| 2006/01    | 36.0        | -1.3              | 6.5            | 6.7            | 5.4                  | 4.9              | 4.9              | 4.6                    |
| 2006/02    | 35.6        | -1.5              | 6.2            | 6.7            | 5.4                  | 4.9              | 5.3              | 4.6                    |
| 2006/03    | 38.2        | +1.0              | 7.8            | 7.0            | 6.1                  | 6.1              | 5.4              | 5.2                    |
| 2006/04    | 42.1        | +3.7              | 8.4            | 8.2            | 6.7                  | 6.3              | 6.6              | 5.6                    |
| 2006/05    | 44.5        | +7.0              | 7.4            | 7.8            | 7.5                  | 5.8              | 6.4              | 5.9                    |
| 2006/06    | 44.4        | +6.7              | 6.9            | 9.1            | 8.5                  | 4.8              | 5.8              | 5.5                    |
| 2006/07    | 44.7        | +3.2              | 7.1            | 9.0            | 8.2                  | 4.1              | 5.3              | 5.1                    |
| 2006/08    | 43.7        | +0.8              | 6.7            | 9.3            | 7.4                  | 3.6              | 5.2              | 4.7                    |
| 2006/09    | 40.5        | -0.8              | 4.7            | 7.0            | 5.6                  | 2.8              | 4.5              | 4.1                    |
| 2006/10    | 38.9        | -0.5              | 4.6            | 6.5            | 5.6                  | 3.5              | 5.0              | 4.5                    |
| 2006/11    | 37.5        | -1.3              | 4.6            | 5.5            | 4.9                  | 3.9              | 4.4              | 4.1                    |
| 2006/12    | 36.8        | -1.3              | 6.0            | 5.7            | 5.2                  | 4.4              | 4.4              | 4.4                    |



**Table S8.** Same as Table S1 for OMI vs. TES\* over NH jet ( $25^\circ \text{N} < \text{Lat} \leq 35^\circ \text{N}$ )

| Year/Month | $\mu_{TES^*}$ | $\mu_{(OMI-TES^*)}$ | $\sigma_{OMI}$ | $\sigma_{TES^*}$ | $\sigma_{(OMI-TES^*)}$ | $\sigma_{OMI}^*$ | $\sigma_{TES^*}^*$ | $\sigma_{(OMI-TES^*)}^*$ |
|------------|---------------|---------------------|----------------|------------------|------------------------|------------------|--------------------|--------------------------|
| 2005/01    | 34.8          | +2.4 (+2.2)         | 6.5            | 5.8              | 4.8                    | 4.2              | 4.2                | 3.2                      |
| 2005/02    | 36.1          | +2.3 (+1.6)         | 6.7            | 6.7              | 5.4                    | 4.3              | 4.7                | 3.8                      |
| 2005/03    | 39.7          | +1.1 (+0.4)         | 6.9            | 7.4              | 5.2                    | 4.8              | 5.2                | 3.8                      |
| 2005/04    | 44.5          | +2.1 (+0.5)         | 6.6            | 6.3              | 6.3                    | 2.7              | 2.9                | 2.3                      |
| 2005/05    | 45.9          | +7.6 (+5.9)         | 7.5            | 6.8              | 6.0                    | 4.7              | 4.7                | 4.0                      |
| 2005/07    | 45.7          | +1.9 (+3.1)         | 7.4            | 9.1              | 6.7                    | 4.2              | 5.8                | 5.1                      |
| 2005/08    | 42.5          | +1.6 (+1.6)         | 6.1            | 8.0              | 6.1                    | 3.3              | 5.3                | 4.6                      |
| 2005/09    | 41.7          | -0.2 (-0.1)         | 4.5            | 7.1              | 5.7                    | 2.3              | 4.1                | 3.4                      |
| 2005/10    | 38.2          | +0.3 (-1.2)         | 4.4            | 6.2              | 4.9                    | 3.3              | 4.8                | 4.0                      |
| 2005/11    | 34.5          | +0.4 (+0.2)         | 4.8            | 5.6              | 4.3                    | 3.4              | 4.4                | 3.7                      |
| 2005/12    | 32.7          | +1.2 (+0.6)         | 5.3            | 5.2              | 4.9                    | 4.0              | 4.3                | 3.9                      |
| 2006/01    | 33.6          | +1.1 (+0.9)         | 6.5            | 6.3              | 5.2                    | 4.9              | 4.7                | 4.4                      |
| 2006/02    | 33.9          | +0.1 (+0.8)         | 6.2            | 6.4              | 5.2                    | 4.9              | 5.1                | 4.5                      |
| 2006/03    | 37.4          | +1.9 (+1.6)         | 7.8            | 7.0              | 6.0                    | 6.1              | 5.5                | 5.2                      |
| 2006/04    | 42.8          | +3.1 (+1.9)         | 8.4            | 8.3              | 6.7                    | 6.3              | 6.6                | 5.7                      |
| 2006/05    | 45.9          | +5.6 (+4.0)         | 7.4            | 7.5              | 7.2                    | 5.8              | 6.3                | 6.2                      |
| 2006/06    | 45.9          | +5.1 (+4.5)         | 6.9            | 8.5              | 7.3                    | 4.8              | 6.0                | 5.6                      |
| 2006/07    | 45.3          | +2.5 (+4.5)         | 7.1            | 8.5              | 6.9                    | 4.1              | 5.7                | 5.1                      |
| 2006/08    | 43.9          | +0.6 (+3.1)         | 6.7            | 8.8              | 6.9                    | 3.6              | 5.5                | 4.8                      |
| 2006/09    | 40.1          | -0.4 (+1.8)         | 4.7            | 6.9              | 5.6                    | 2.8              | 4.7                | 4.2                      |
| 2006/10    | 37.2          | +1.1 (+1.5)         | 4.6            | 6.5              | 5.4                    | 3.5              | 5.1                | 4.4                      |
| 2006/11    | 34.9          | +1.3 (+1.4)         | 4.6            | 5.4              | 4.7                    | 3.9              | 4.5                | 4.1                      |
| 2006/12    | 34.2          | +1.3 (+1.2)         | 6.0            | 5.6              | 5.2                    | 4.4              | 4.4                | 4.4                      |

**Table S9.** Same as Table S1 for NH tropics ( $0 < \text{Lat} \leq 25^\circ \text{ N}$ )

| Year/Month | $\mu_{OMI}$ | $\mu_{(CTM-OMI)}$ | $\sigma_{CTM}$ | $\sigma_{OMI}$ | $\sigma_{(CTM-OMI)}$ | $\sigma_{CTM}^*$ | $\sigma_{OMI}^*$ | $\sigma_{(CTM-OMI)}^*$ |
|------------|-------------|-------------------|----------------|----------------|----------------------|------------------|------------------|------------------------|
| 2005/01    | 34.5        | -0.1              | 3.8            | 5.3            | 4.4                  | 2.6              | 3.8              | 3.6                    |
| 2005/02    | 34.0        | -0.2              | 4.0            | 5.4            | 4.5                  | 2.4              | 3.8              | 3.7                    |
| 2005/03    | 36.9        | -1.6              | 5.6            | 7.8            | 5.1                  | 3.3              | 5.0              | 4.2                    |
| 2005/04    | 41.2        | -3.7              | 7.3            | 10.6           | 5.8                  | 3.3              | 5.0              | 4.3                    |
| 2005/05    | 41.0        | -3.0              | 8.5            | 11.0           | 5.2                  | 3.5              | 4.9              | 4.3                    |
| 2005/06    | 37.1        | -0.0              | 6.9            | 7.5            | 4.0                  | 2.9              | 4.1              | 3.5                    |
| 2005/07    | 33.2        | +1.6              | 4.0            | 4.0            | 3.4                  | 2.7              | 3.2              | 2.9                    |
| 2005/08    | 33.2        | +0.7              | 3.2            | 3.6            | 3.4                  | 2.3              | 3.1              | 3.0                    |
| 2005/09    | 34.6        | -1.2              | 3.5            | 4.1            | 3.9                  | 2.3              | 3.4              | 3.3                    |
| 2005/10    | 34.2        | -1.7              | 3.9            | 4.2            | 4.0                  | 2.5              | 3.5              | 3.5                    |
| 2005/11    | 33.4        | -0.8              | 3.0            | 3.9            | 3.7                  | 2.1              | 3.3              | 3.3                    |
| 2005/12    | 33.9        | +0.3              | 3.1            | 4.2            | 4.3                  | 2.5              | 3.6              | 3.7                    |
| 2006/01    | 33.0        | +1.5              | 3.7            | 4.8            | 4.7                  | 2.7              | 3.9              | 4.1                    |
| 2006/02    | 32.4        | +2.0              | 4.1            | 4.8            | 4.5                  | 3.0              | 4.1              | 4.1                    |
| 2006/03    | 37.5        | +0.3              | 4.9            | 7.1            | 5.0                  | 3.4              | 4.8              | 4.3                    |
| 2006/04    | 42.1        | -2.9              | 6.5            | 9.5            | 5.5                  | 3.5              | 4.9              | 4.4                    |
| 2006/05    | 41.4        | -2.8              | 7.1            | 9.8            | 5.4                  | 3.5              | 4.4              | 4.2                    |
| 2006/06    | 37.3        | +1.4              | 4.2            | 6.0            | 4.8                  | 2.9              | 3.7              | 3.6                    |
| 2006/07    | 34.1        | +3.2              | 3.6            | 3.6            | 4.1                  | 2.8              | 3.1              | 3.0                    |
| 2006/08    | 33.5        | +3.1              | 4.5            | 3.5            | 4.3                  | 2.6              | 2.9              | 3.2                    |
| 2006/09    | 34.7        | +0.8              | 4.7            | 4.2            | 4.0                  | 2.6              | 3.1              | 3.1                    |
| 2006/10    | 35.3        | -1.1              | 3.6            | 3.9            | 3.8                  | 2.5              | 3.4              | 3.3                    |
| 2006/11    | 34.3        | -1.5              | 2.9            | 3.7            | 3.8                  | 2.2              | 3.3              | 3.2                    |
| 2006/12    | 32.8        | -0.5              | 3.4            | 4.6            | 4.0                  | 2.3              | 3.5              | 3.4                    |

**Table S10.** Same as Table S1 for CTM vs. TES over NH tropics ( $0 < \text{Lat} \leq 25^\circ \text{ N}$ )

| Year/Month | $\mu_{TES}$ | $\mu_{(CTM-TES)}$ | $\sigma_{CTM}$ | $\sigma_{TES}$ | $\sigma_{(CTM-TES)}$ | $\sigma_{CTM}^*$ | $\sigma_{TES}^*$ | $\sigma_{(CTM-TES)}^*$ |
|------------|-------------|-------------------|----------------|----------------|----------------------|------------------|------------------|------------------------|
| 2005/01    | 34.1        | +1.9              | 6.8            | 7.4            | 4.4                  | 3.6              | 4.3              | 3.5                    |
| 2005/02    | 33.2        | +1.5              | 7.7            | 7.4            | 4.8                  | 3.5              | 4.2              | 3.4                    |
| 2005/03    | 36.1        | -0.7              | 8.6            | 8.8            | 5.5                  | 4.9              | 5.4              | 4.0                    |
| 2005/04    | 36.4        | -0.5              | 7.7            | 9.2            | 5.0                  | 2.9              | 3.9              | 3.0                    |
| 2005/05    | 35.4        | -0.3              | 8.9            | 9.8            | 5.2                  | 3.0              | 4.1              | 3.4                    |
| 2005/07    | 32.2        | +1.8              | 8.3            | 9.1            | 4.4                  | 3.1              | 4.3              | 3.7                    |
| 2005/08    | 31.2        | +1.8              | 8.1            | 8.5            | 4.5                  | 3.0              | 3.9              | 3.5                    |
| 2005/09    | 32.4        | +0.1              | 8.3            | 8.4            | 4.9                  | 2.6              | 3.6              | 3.3                    |
| 2005/10    | 32.1        | -0.2              | 7.8            | 8.2            | 4.3                  | 3.5              | 4.4              | 3.7                    |
| 2005/11    | 32.8        | +0.5              | 6.9            | 7.4            | 4.4                  | 3.1              | 4.1              | 3.6                    |
| 2005/12    | 35.0        | +1.6              | 6.5            | 7.5            | 4.5                  | 3.3              | 4.3              | 3.8                    |
| 2006/01    | 33.9        | +2.6              | 7.4            | 7.7            | 4.5                  | 3.8              | 4.6              | 4.0                    |
| 2006/02    | 32.3        | +3.6              | 9.0            | 8.2            | 4.7                  | 4.8              | 4.6              | 3.8                    |
| 2006/03    | 34.8        | +3.6              | 8.5            | 8.4            | 4.8                  | 4.6              | 4.8              | 4.0                    |
| 2006/04    | 36.4        | +2.3              | 8.9            | 10.0           | 5.6                  | 4.8              | 5.6              | 4.3                    |
| 2006/05    | 35.3        | +1.5              | 9.5            | 9.5            | 5.6                  | 4.8              | 5.1              | 4.4                    |
| 2006/06    | 32.9        | +3.5              | 8.6            | 8.9            | 5.0                  | 3.7              | 4.7              | 4.0                    |
| 2006/07    | 32.0        | +4.6              | 8.8            | 9.4            | 4.9                  | 3.5              | 4.6              | 3.8                    |
| 2006/08    | 31.6        | +3.7              | 8.2            | 8.9            | 4.9                  | 3.4              | 4.4              | 3.8                    |
| 2006/09    | 31.9        | +2.0              | 8.2            | 8.1            | 4.8                  | 3.4              | 4.1              | 3.6                    |
| 2006/10    | 32.2        | +0.9              | 8.1            | 8.3            | 4.5                  | 3.9              | 4.8              | 3.9                    |
| 2006/11    | 33.2        | +0.3              | 7.3            | 7.3            | 4.6                  | 3.9              | 4.7              | 3.8                    |
| 2006/12    | 33.0        | +1.9              | 7.6            | 7.0            | 4.6                  | 4.0              | 4.4              | 3.7                    |

**Table S11.** Same as Table S1 for OMI vs. TES over NH tropics ( $0 < \text{Lat} \leq 25^\circ \text{ N}$ )

| Year/Month | $\mu_{TES}$ | $\mu_{(OMI-TES)}$ | $\sigma_{OMI}$ | $\sigma_{TES}$ | $\sigma_{(OMI-TES)}$ | $\sigma^*_{OMI}$ | $\sigma^*_{TES}$ | $\sigma^*_{(OMI-TES)}$ |
|------------|-------------|-------------------|----------------|----------------|----------------------|------------------|------------------|------------------------|
| 2005/01    | 33.7        | -1.7              | 4.7            | 7.5            | 6.5                  | 2.2              | 3.4              | 3.2                    |
| 2005/02    | 32.4        | -1.0              | 4.6            | 7.4            | 6.2                  | 2.1              | 3.5              | 3.0                    |
| 2005/03    | 35.3        | -1.3              | 6.9            | 9.0            | 6.0                  | 2.7              | 4.2              | 3.1                    |
| 2005/04    | 36.3        | +1.5              | 8.9            | 9.5            | 6.0                  | 1.6              | 2.6              | 2.0                    |
| 2005/05    | 35.9        | +3.5              | 10.2           | 9.6            | 6.8                  | 2.8              | 3.9              | 3.4                    |
| 2005/07    | 32.2        | +0.5              | 3.6            | 9.3            | 7.8                  | 2.1              | 4.1              | 3.8                    |
| 2005/08    | 31.2        | +1.5              | 3.0            | 8.6            | 7.3                  | 2.0              | 3.8              | 3.4                    |
| 2005/09    | 32.6        | +0.7              | 3.3            | 8.6            | 7.9                  | 1.7              | 3.2              | 3.1                    |
| 2005/10    | 32.3        | +0.2              | 3.5            | 8.3            | 7.0                  | 2.3              | 4.2              | 3.7                    |
| 2005/11    | 33.0        | -1.4              | 3.2            | 7.3            | 6.2                  | 2.2              | 3.7              | 3.4                    |
| 2005/12    | 34.7        | -2.5              | 3.4            | 7.4            | 6.9                  | 2.5              | 3.9              | 3.7                    |
| 2006/01    | 33.9        | -2.9              | 3.7            | 7.7            | 6.6                  | 2.7              | 4.1              | 3.9                    |
| 2006/02    | 31.9        | -1.5              | 3.8            | 8.1            | 6.6                  | 2.5              | 3.9              | 3.5                    |
| 2006/03    | 34.8        | +0.3              | 5.8            | 8.4            | 5.9                  | 3.4              | 4.3              | 3.7                    |
| 2006/04    | 36.6        | +3.8              | 8.7            | 10.3           | 7.0                  | 3.7              | 5.2              | 4.1                    |
| 2006/05    | 35.4        | +5.2              | 9.3            | 9.6            | 7.0                  | 3.4              | 4.9              | 4.3                    |
| 2006/06    | 32.8        | +4.2              | 5.6            | 9.0            | 7.2                  | 2.6              | 4.4              | 4.2                    |
| 2006/07    | 31.9        | +2.1              | 3.2            | 9.5            | 8.3                  | 2.3              | 4.4              | 3.9                    |
| 2006/08    | 31.8        | +1.4              | 2.9            | 9.1            | 8.4                  | 1.9              | 4.2              | 3.9                    |
| 2006/09    | 32.0        | +1.6              | 3.7            | 8.5            | 8.0                  | 2.0              | 3.8              | 3.4                    |
| 2006/10    | 32.3        | +1.4              | 3.1            | 8.1            | 7.2                  | 2.3              | 4.4              | 3.9                    |
| 2006/11    | 33.1        | -0.3              | 3.3            | 7.4            | 6.5                  | 2.4              | 4.4              | 3.9                    |
| 2006/12    | 33.0        | -1.7              | 4.1            | 7.0            | 5.9                  | 2.6              | 4.1              | 3.7                    |

**Table S12.** Same as Table S1 for OMI vs. TES\* over NH tropics ( $0 < \text{Lat} \leq 25^\circ \text{ N}$ )

| Year/Month | $\mu_{TES^*}$ | $\mu_{(OMI-TES^*)}$ | $\sigma_{OMI}$ | $\sigma_{TES^*}$ | $\sigma_{(OMI-TES^*)}$ | $\sigma_{OMI}^*$ | $\sigma_{TES^*}^*$ | $\sigma_{(OMI-TES^*)}^*$ |
|------------|---------------|---------------------|----------------|------------------|------------------------|------------------|--------------------|--------------------------|
| 2005/01    | 32.8          | -0.8 (-0.3)         | 4.7            | 6.8              | 5.8                    | 2.2              | 3.4                | 3.3                      |
| 2005/02    | 31.9          | -0.5 (-1.0)         | 4.6            | 6.9              | 5.7                    | 2.1              | 3.5                | 3.1                      |
| 2005/03    | 35.2          | -1.2 (-1.9)         | 6.9            | 8.9              | 5.6                    | 2.7              | 4.3                | 3.2                      |
| 2005/04    | 37.2          | +0.6 (+0.1)         | 8.9            | 9.1              | 5.3                    | 1.6              | 2.5                | 1.9                      |
| 2005/05    | 36.4          | +3.1 (+1.3)         | 10.2           | 9.5              | 5.9                    | 2.8              | 3.9                | 3.3                      |
| 2005/07    | 32.8          | -0.0 (-0.5)         | 3.6            | 7.6              | 5.9                    | 2.1              | 4.3                | 3.9                      |
| 2005/08    | 31.9          | +0.8 (+0.1)         | 3.0            | 6.9              | 5.7                    | 2.0              | 4.0                | 3.7                      |
| 2005/09    | 33.0          | +0.3 (-0.5)         | 3.3            | 7.2              | 6.3                    | 1.7              | 3.5                | 3.3                      |
| 2005/10    | 32.4          | +0.0 (-0.7)         | 3.5            | 7.2              | 5.7                    | 2.3              | 4.4                | 3.9                      |
| 2005/11    | 32.2          | -0.6 (-0.6)         | 3.2            | 6.4              | 5.6                    | 2.2              | 3.7                | 3.6                      |
| 2005/12    | 33.7          | -1.5 (-0.3)         | 3.4            | 6.8              | 6.6                    | 2.5              | 3.9                | 3.9                      |
| 2006/01    | 33.1          | -2.1 (-0.9)         | 3.7            | 7.0              | 6.1                    | 2.7              | 4.2                | 4.1                      |
| 2006/02    | 31.4          | -1.0 (-0.5)         | 3.8            | 7.2              | 5.9                    | 2.5              | 3.9                | 3.6                      |
| 2006/03    | 34.9          | +0.2 (+0.9)         | 5.8            | 8.1              | 5.4                    | 3.4              | 4.5                | 3.8                      |
| 2006/04    | 37.5          | +2.9 (+3.1)         | 8.7            | 10.1             | 6.5                    | 3.7              | 5.3                | 4.2                      |
| 2006/05    | 36.1          | +4.5 (+3.3)         | 9.3            | 9.4              | 5.9                    | 3.4              | 5.2                | 4.3                      |
| 2006/06    | 33.5          | +3.5 (+1.3)         | 5.6            | 8.2              | 5.8                    | 2.6              | 4.6                | 4.2                      |
| 2006/07    | 32.3          | +1.6 (+0.9)         | 3.2            | 8.0              | 6.7                    | 2.3              | 4.6                | 4.1                      |
| 2006/08    | 32.3          | +0.9 (-0.5)         | 2.9            | 7.6              | 6.8                    | 1.9              | 4.5                | 4.1                      |
| 2006/09    | 32.5          | +1.2 (-0.4)         | 3.7            | 7.4              | 6.8                    | 2.0              | 4.1                | 3.7                      |
| 2006/10    | 32.4          | +1.3 (+0.0)         | 3.1            | 7.0              | 6.1                    | 2.3              | 4.6                | 4.0                      |
| 2006/11    | 32.5          | +0.3 (+0.3)         | 3.3            | 6.8              | 5.9                    | 2.4              | 4.5                | 4.1                      |
| 2006/12    | 32.0          | -0.8 (+0.8)         | 4.1            | 6.4              | 5.3                    | 2.6              | 4.0                | 3.8                      |

**Table S13.** Same as Table S1 for SH tropics ( $25^{\circ}\text{S} < \text{Lat} \leq 0$ )

| Year/Month | $\mu_{OMI}$ | $\mu_{(CTM-OMI)}$ | $\sigma_{CTM}$ | $\sigma_{OMI}$ | $\sigma_{(CTM-OMI)}$ | $\sigma_{CTM}^*$ | $\sigma_{OMI}^*$ | $\sigma_{(CTM-OMI)}^*$ |
|------------|-------------|-------------------|----------------|----------------|----------------------|------------------|------------------|------------------------|
| 2005/01    | 29.4        | +3.3              | 4.2            | 5.0            | 3.7                  | 2.8              | 3.5              | 3.3                    |
| 2005/02    | 28.2        | +2.9              | 4.4            | 4.8            | 3.3                  | 2.4              | 3.1              | 3.0                    |
| 2005/03    | 28.0        | +1.8              | 4.2            | 4.8            | 3.1                  | 2.4              | 3.2              | 2.8                    |
| 2005/04    | 28.2        | +1.3              | 3.3            | 4.5            | 3.0                  | 2.0              | 2.9              | 2.7                    |
| 2005/05    | 29.9        | -0.2              | 3.0            | 4.1            | 3.2                  | 2.1              | 3.2              | 2.6                    |
| 2005/06    | 33.1        | -2.0              | 3.4            | 4.2            | 3.7                  | 2.1              | 3.4              | 2.9                    |
| 2005/07    | 34.1        | -1.5              | 3.9            | 5.1            | 4.0                  | 2.6              | 3.9              | 3.3                    |
| 2005/08    | 35.4        | +0.2              | 4.6            | 5.5            | 4.0                  | 3.0              | 4.3              | 3.6                    |
| 2005/09    | 39.4        | +0.8              | 5.8            | 5.8            | 5.2                  | 3.3              | 4.6              | 4.3                    |
| 2005/10    | 41.2        | +0.9              | 7.4            | 6.4            | 6.5                  | 3.6              | 4.9              | 4.6                    |
| 2005/11    | 38.1        | +1.6              | 6.2            | 6.0            | 5.5                  | 3.3              | 4.5              | 4.2                    |
| 2005/12    | 34.4        | +3.3              | 4.2            | 5.5            | 4.2                  | 3.2              | 4.1              | 3.8                    |
| 2006/01    | 29.6        | +3.0              | 4.6            | 5.2            | 3.5                  | 3.0              | 3.6              | 3.3                    |
| 2006/02    | 28.4        | +3.6              | 4.9            | 5.0            | 3.3                  | 2.6              | 3.2              | 3.0                    |
| 2006/03    | 28.3        | +4.3              | 4.2            | 4.7            | 3.7                  | 2.7              | 3.0              | 3.0                    |
| 2006/04    | 28.9        | +4.3              | 3.4            | 3.9            | 3.4                  | 2.5              | 2.8              | 2.9                    |
| 2006/05    | 31.6        | +2.0              | 3.3            | 3.8            | 3.4                  | 2.4              | 3.2              | 3.0                    |
| 2006/06    | 35.1        | -0.5              | 4.3            | 4.6            | 4.8                  | 2.9              | 3.7              | 3.4                    |
| 2006/07    | 35.4        | +0.7              | 5.0            | 4.7            | 5.0                  | 3.2              | 3.9              | 3.6                    |
| 2006/08    | 37.0        | +1.2              | 4.9            | 5.0            | 4.6                  | 3.5              | 4.2              | 4.0                    |
| 2006/09    | 40.3        | +1.3              | 4.9            | 5.6            | 4.8                  | 3.6              | 4.4              | 4.3                    |
| 2006/10    | 39.7        | +2.8              | 5.6            | 5.8            | 5.3                  | 3.7              | 4.7              | 4.8                    |
| 2006/11    | 37.0        | +3.2              | 5.9            | 5.6            | 5.1                  | 3.2              | 4.2              | 4.3                    |
| 2006/12    | 32.6        | +4.2              | 5.1            | 5.3            | 4.6                  | 3.1              | 3.9              | 3.9                    |

**Table S14.** Same as Table S1 for CTM vs. TES over SH tropics ( $25^{\circ} \text{S} < \text{Lat} \leq 0$ )

| Year/Month | $\mu_{TES}$ | $\mu_{(CTM-TES)}$ | $\sigma_{CTM}$ | $\sigma_{TES}$ | $\sigma_{(CTM-TES)}$ | $\sigma_{CTM}^*$ | $\sigma_{TES}^*$ | $\sigma_{(CTM-TES)}^*$ |
|------------|-------------|-------------------|----------------|----------------|----------------------|------------------|------------------|------------------------|
| 2005/01    | 28.6        | +2.4              | 7.0            | 7.2            | 4.8                  | 3.5              | 4.0              | 3.2                    |
| 2005/02    | 27.1        | +1.9              | 7.7            | 7.6            | 4.7                  | 3.0              | 3.5              | 3.1                    |
| 2005/03    | 27.6        | +0.8              | 7.1            | 7.0            | 5.5                  | 3.2              | 3.9              | 3.4                    |
| 2005/04    | 28.2        | +0.7              | 6.3            | 7.2            | 5.4                  | 2.0              | 2.5              | 2.5                    |
| 2005/05    | 29.3        | +1.5              | 5.6            | 5.3            | 4.6                  | 2.3              | 2.6              | 2.8                    |
| 2005/07    | 33.1        | +1.6              | 6.5            | 6.7            | 4.1                  | 3.3              | 4.1              | 3.6                    |
| 2005/08    | 33.4        | +2.4              | 7.8            | 8.1            | 4.1                  | 3.7              | 4.4              | 3.7                    |
| 2005/09    | 36.4        | +1.1              | 7.9            | 9.0            | 5.0                  | 3.7              | 4.1              | 3.9                    |
| 2005/10    | 39.3        | +0.4              | 9.3            | 8.8            | 5.8                  | 5.3              | 5.4              | 4.6                    |
| 2005/11    | 36.0        | +1.2              | 8.8            | 8.4            | 6.0                  | 4.7              | 5.1              | 4.4                    |
| 2005/12    | 33.4        | +1.9              | 7.5            | 7.4            | 5.4                  | 4.2              | 4.4              | 3.9                    |
| 2006/01    | 30.3        | +2.2              | 7.4            | 7.8            | 4.8                  | 3.9              | 4.6              | 3.8                    |
| 2006/02    | 27.6        | +3.1              | 8.8            | 9.1            | 4.8                  | 3.4              | 4.1              | 3.5                    |
| 2006/03    | 26.0        | +4.2              | 8.0            | 7.9            | 5.2                  | 3.4              | 3.7              | 3.6                    |
| 2006/04    | 25.6        | +5.8              | 6.8            | 6.5            | 5.4                  | 3.2              | 3.5              | 3.7                    |
| 2006/05    | 30.0        | +4.2              | 6.4            | 6.3            | 5.2                  | 3.2              | 4.2              | 3.9                    |
| 2006/06    | 32.8        | +2.8              | 6.2            | 6.4            | 5.1                  | 3.4              | 4.4              | 3.9                    |
| 2006/07    | 31.8        | +5.0              | 6.9            | 7.0            | 4.3                  | 3.7              | 4.2              | 3.6                    |
| 2006/08    | 33.9        | +4.3              | 7.8            | 7.8            | 4.3                  | 4.2              | 4.5              | 3.9                    |
| 2006/09    | 37.3        | +2.9              | 7.9            | 8.5            | 4.9                  | 4.6              | 4.9              | 4.1                    |
| 2006/10    | 35.9        | +3.7              | 9.8            | 9.3            | 6.0                  | 5.6              | 5.4              | 4.8                    |
| 2006/11    | 34.7        | +3.2              | 9.2            | 7.7            | 6.1                  | 5.1              | 4.8              | 4.6                    |
| 2006/12    | 31.5        | +3.0              | 8.2            | 7.1            | 5.7                  | 4.3              | 4.5              | 4.1                    |

**Table S15.** Same as Table S1 for OMI vs. TES over SH tropics ( $25^{\circ} \text{S} < \text{Lat} \leq 0$ )

| Year/Month | $\mu_{TES}$ | $\mu_{(OMI-TES)}$ | $\sigma_{OMI}$ | $\sigma_{TES}$ | $\sigma_{(OMI-TES)}$ | $\sigma_{OMI}^*$ | $\sigma_{TES}^*$ | $\sigma_{(OMI-TES)}^*$ |
|------------|-------------|-------------------|----------------|----------------|----------------------|------------------|------------------|------------------------|
| 2005/01    | 28.8        | -0.8              | 4.4            | 7.3            | 6.9                  | 2.0              | 3.8              | 3.2                    |
| 2005/02    | 27.0        | +0.3              | 4.4            | 7.4            | 6.7                  | 1.7              | 2.9              | 2.6                    |
| 2005/03    | 27.5        | -0.6              | 4.3            | 7.1            | 6.7                  | 1.8              | 3.4              | 3.0                    |
| 2005/04    | 28.0        | -1.0              | 4.3            | 7.1            | 6.5                  | 0.9              | 1.8              | 1.7                    |
| 2005/05    | 29.4        | +0.4              | 3.4            | 5.3            | 5.3                  | 1.5              | 2.4              | 2.3                    |
| 2005/07    | 33.0        | -0.1              | 4.6            | 6.6            | 7.1                  | 2.7              | 3.7              | 3.7                    |
| 2005/08    | 33.3        | +0.4              | 5.1            | 8.2            | 7.8                  | 3.1              | 4.2              | 3.8                    |
| 2005/09    | 36.2        | +0.7              | 5.4            | 9.3            | 8.1                  | 2.3              | 3.6              | 3.3                    |
| 2005/10    | 39.6        | -0.8              | 5.6            | 8.8            | 7.6                  | 3.4              | 5.2              | 4.2                    |
| 2005/11    | 36.4        | -0.8              | 5.1            | 8.6            | 6.8                  | 3.0              | 4.8              | 3.8                    |
| 2005/12    | 33.3        | -1.0              | 4.5            | 7.4            | 6.8                  | 2.7              | 4.1              | 3.9                    |
| 2006/01    | 30.5        | -2.0              | 4.5            | 7.8            | 6.8                  | 2.6              | 4.4              | 4.1                    |
| 2006/02    | 27.5        | -0.1              | 4.4            | 8.9            | 7.3                  | 2.2              | 3.8              | 3.5                    |
| 2006/03    | 25.8        | +1.5              | 4.1            | 7.9            | 7.2                  | 2.0              | 3.5              | 3.4                    |
| 2006/04    | 25.4        | +2.3              | 3.3            | 6.6            | 5.9                  | 1.8              | 3.3              | 3.0                    |
| 2006/05    | 29.8        | +0.9              | 3.3            | 6.5            | 5.6                  | 2.3              | 4.0              | 3.4                    |
| 2006/06    | 32.7        | +1.5              | 4.2            | 6.5            | 6.5                  | 2.9              | 4.2              | 3.9                    |
| 2006/07    | 31.6        | +2.5              | 4.0            | 7.0            | 7.0                  | 2.9              | 3.9              | 3.6                    |
| 2006/08    | 33.7        | +1.7              | 4.3            | 7.6            | 7.4                  | 2.9              | 4.1              | 3.7                    |
| 2006/09    | 37.2        | +1.2              | 4.8            | 8.7            | 7.6                  | 2.9              | 4.6              | 4.0                    |
| 2006/10    | 36.0        | +1.1              | 4.9            | 9.2            | 7.4                  | 3.2              | 5.0              | 4.0                    |
| 2006/11    | 34.7        | +0.1              | 4.6            | 7.5            | 6.3                  | 2.7              | 4.6              | 4.0                    |
| 2006/12    | 31.5        | -0.5              | 4.6            | 7.1            | 6.3                  | 2.8              | 4.3              | 4.0                    |



**Table S16.** Same as Table S1 for OMI vs. TES\* over SH tropics ( $25^{\circ} \text{S} < \text{Lat} \leq 0$ )

| Year/Month | $\mu_{TES^*}$ | $\mu_{(OMI-TES^*)}$ | $\sigma_{OMI}$ | $\sigma_{TES^*}$ | $\sigma_{(OMI-TES^*)}$ | $\sigma_{OMI}^*$ | $\sigma_{TES^*}^*$ | $\sigma_{(OMI-TES^*)}^*$ |
|------------|---------------|---------------------|----------------|------------------|------------------------|------------------|--------------------|--------------------------|
| 2005/01    | 28.7          | -0.7 (-2.6)         | 4.4            | 7.1              | 6.0                    | 2.0              | 3.9                | 3.3                      |
| 2005/02    | 27.2          | +0.1 (-2.7)         | 4.4            | 6.9              | 5.6                    | 1.7              | 3.0                | 2.8                      |
| 2005/03    | 28.0          | -1.2 (-2.5)         | 4.3            | 6.6              | 6.0                    | 1.8              | 3.5                | 3.2                      |
| 2005/04    | 27.9          | -0.9 (-2.5)         | 4.3            | 6.6              | 5.9                    | 0.9              | 1.9                | 1.8                      |
| 2005/05    | 28.2          | +1.6 (+1.3)         | 3.4            | 4.6              | 4.5                    | 1.5              | 2.4                | 2.3                      |
| 2005/07    | 32.4          | +0.5 (+1.8)         | 4.7            | 5.8              | 6.2                    | 2.7              | 3.8                | 3.7                      |
| 2005/08    | 32.8          | +0.9 (+0.3)         | 5.1            | 7.2              | 6.6                    | 3.1              | 4.3                | 3.9                      |
| 2005/09    | 35.9          | +1.0 (-1.9)         | 5.4            | 8.5              | 7.1                    | 2.3              | 3.7                | 3.5                      |
| 2005/10    | 39.6          | -0.8 (-3.8)         | 5.6            | 8.3              | 6.6                    | 3.4              | 5.3                | 4.4                      |
| 2005/11    | 36.5          | -0.9 (-3.5)         | 5.1            | 8.4              | 6.1                    | 3.0              | 4.9                | 4.0                      |
| 2005/12    | 33.5          | -1.1 (-3.4)         | 4.5            | 7.2              | 6.1                    | 2.7              | 4.2                | 4.0                      |
| 2006/01    | 30.4          | -1.9 (-2.0)         | 4.5            | 7.5              | 6.2                    | 2.6              | 4.5                | 4.2                      |
| 2006/02    | 27.8          | -0.4 (-1.7)         | 4.4            | 8.2              | 6.4                    | 2.2              | 3.9                | 3.6                      |
| 2006/03    | 26.2          | +1.1 (-1.3)         | 4.1            | 7.1              | 6.1                    | 2.0              | 3.7                | 3.5                      |
| 2006/04    | 25.4          | +2.4 (-0.0)         | 3.3            | 6.2              | 5.2                    | 1.8              | 3.5                | 3.2                      |
| 2006/05    | 29.3          | +1.3 (+1.1)         | 3.3            | 6.3              | 5.2                    | 2.3              | 4.2                | 3.5                      |
| 2006/06    | 32.1          | +2.1 (+2.5)         | 4.2            | 6.2              | 6.0                    | 2.9              | 4.3                | 3.9                      |
| 2006/07    | 31.1          | +3.0 (+3.1)         | 4.0            | 6.4              | 6.1                    | 2.9              | 4.0                | 3.6                      |
| 2006/08    | 33.5          | +1.9 (+1.4)         | 4.3            | 6.6              | 6.2                    | 2.9              | 4.2                | 3.8                      |
| 2006/09    | 37.4          | +1.0 (-1.1)         | 4.8            | 8.2              | 6.9                    | 2.9              | 4.7                | 4.1                      |
| 2006/10    | 36.2          | +0.8 (-2.3)         | 4.9            | 8.6              | 6.6                    | 3.2              | 5.0                | 4.2                      |
| 2006/11    | 34.8          | +0.0 (-2.8)         | 4.6            | 7.4              | 5.7                    | 2.7              | 4.7                | 4.1                      |
| 2006/12    | 31.8          | -0.8 (-3.3)         | 4.6            | 7.3              | 5.9                    | 2.8              | 4.4                | 4.1                      |

**Table S17.** Same as Table S1 for SH jet ( $35^\circ \text{ S} < \text{Lat} < 25^\circ \text{ S}$ )

| Year/Month | $\mu_{OMI}$ | $\mu_{(CTM-OMI)}$ | $\sigma_{CTM}$ | $\sigma_{OMI}$ | $\sigma_{(CTM-OMI)}$ | $\sigma_{CTM}^*$ | $\sigma_{OMI}^*$ | $\sigma_{(CTM-OMI)}^*$ |
|------------|-------------|-------------------|----------------|----------------|----------------------|------------------|------------------|------------------------|
| 2005/01    | 36.1        | +0.8              | 3.7            | 5.2            | 4.0                  | 3.2              | 4.9              | 3.9                    |
| 2005/02    | 34.6        | +1.4              | 3.6            | 4.5            | 3.5                  | 2.9              | 4.0              | 3.4                    |
| 2005/03    | 32.9        | +0.9              | 4.1            | 4.8            | 3.3                  | 3.1              | 4.1              | 3.2                    |
| 2005/04    | 33.3        | -1.2              | 3.9            | 5.2            | 3.2                  | 3.1              | 4.5              | 3.1                    |
| 2005/05    | 31.8        | -0.3              | 3.8            | 5.2            | 3.1                  | 3.4              | 4.8              | 2.9                    |
| 2005/06    | 32.2        | +0.7              | 4.7            | 6.1            | 3.3                  | 4.3              | 5.6              | 3.1                    |
| 2005/07    | 36.4        | +1.2              | 5.1            | 7.5            | 4.8                  | 4.7              | 6.8              | 4.5                    |
| 2005/08    | 36.9        | +3.0              | 5.9            | 7.4            | 4.5                  | 5.4              | 6.4              | 4.1                    |
| 2005/09    | 39.6        | +5.0              | 6.1            | 7.2            | 4.6                  | 5.2              | 6.2              | 4.4                    |
| 2005/10    | 42.2        | +6.2              | 6.5            | 7.8            | 4.8                  | 5.3              | 6.7              | 4.7                    |
| 2005/11    | 39.1        | +5.7              | 6.2            | 7.2            | 4.8                  | 5.2              | 6.2              | 4.6                    |
| 2005/12    | 38.0        | +3.1              | 4.4            | 6.4            | 4.6                  | 3.9              | 5.7              | 4.3                    |
| 2006/01    | 35.7        | +3.4              | 3.7            | 5.2            | 4.2                  | 3.3              | 4.8              | 4.0                    |
| 2006/02    | 34.2        | +2.8              | 4.1            | 4.7            | 3.9                  | 3.2              | 4.2              | 3.7                    |
| 2006/03    | 33.8        | -0.0              | 3.4            | 4.6            | 3.4                  | 2.7              | 4.0              | 3.3                    |
| 2006/04    | 32.6        | +0.3              | 3.8            | 4.5            | 3.1                  | 3.1              | 4.0              | 3.0                    |
| 2006/05    | 30.8        | +1.7              | 4.0            | 5.2            | 3.1                  | 3.6              | 4.7              | 3.0                    |
| 2006/06    | 32.8        | +0.7              | 4.8            | 6.8            | 4.4                  | 4.5              | 6.2              | 4.0                    |
| 2006/07    | 33.8        | +2.0              | 5.2            | 6.8            | 4.7                  | 4.8              | 6.0              | 4.4                    |
| 2006/08    | 35.4        | +3.7              | 5.4            | 7.2            | 4.9                  | 4.9              | 6.2              | 4.6                    |
| 2006/09    | 38.2        | +5.3              | 5.8            | 7.1            | 4.7                  | 5.0              | 6.1              | 4.5                    |
| 2006/10    | 39.5        | +6.5              | 5.5            | 6.9            | 4.9                  | 4.5              | 6.1              | 4.8                    |
| 2006/11    | 38.5        | +6.1              | 5.5            | 6.7            | 4.6                  | 4.3              | 5.7              | 4.4                    |
| 2006/12    | 37.1        | +4.7              | 4.4            | 5.9            | 4.4                  | 3.7              | 5.3              | 4.3                    |

**Table S18.** Same as Table S1 for CTM vs. TES over SH jet ( $35^\circ \text{ S} < \text{Lat} \leq 25^\circ \text{ S}$ )

| Year/Month | $\mu_{TES}$ | $\mu_{(CTM-TES)}$ | $\sigma_{CTM}$ | $\sigma_{TES}$ | $\sigma_{(CTM-TES)}$ | $\sigma_{CTM}^*$ | $\sigma_{TES}^*$ | $\sigma_{(CTM-TES)}^*$ |
|------------|-------------|-------------------|----------------|----------------|----------------------|------------------|------------------|------------------------|
| 2005/01    | 30.6        | +0.4              | 6.0            | 6.8            | 4.0                  | 4.1              | 4.9              | 3.3                    |
| 2005/02    | 28.3        | -0.7              | 5.6            | 5.7            | 3.8                  | 3.8              | 4.0              | 3.2                    |
| 2005/03    | 26.9        | -0.5              | 4.9            | 5.1            | 3.4                  | 3.7              | 3.8              | 2.9                    |
| 2005/04    | 28.5        | -0.6              | 5.0            | 5.6            | 3.9                  | 3.0              | 3.2              | 2.4                    |
| 2005/05    | 28.0        | +0.1              | 4.3            | 4.6            | 3.9                  | 2.5              | 3.2              | 3.1                    |
| 2005/07    | 30.7        | +2.5              | 5.7            | 5.7            | 4.2                  | 4.8              | 4.8              | 4.0                    |
| 2005/08    | 30.6        | +3.0              | 6.2            | 6.3            | 4.5                  | 5.0              | 5.1              | 4.3                    |
| 2005/09    | 33.1        | +1.8              | 6.0            | 6.6            | 5.2                  | 4.4              | 4.9              | 4.4                    |
| 2005/10    | 34.5        | +3.6              | 7.3            | 7.2            | 5.1                  | 6.1              | 5.8              | 4.8                    |
| 2005/11    | 32.4        | +3.6              | 8.3            | 7.3            | 5.2                  | 6.7              | 5.7              | 4.8                    |
| 2005/12    | 31.0        | +2.1              | 6.4            | 6.9            | 4.3                  | 5.0              | 5.4              | 4.0                    |
| 2006/01    | 31.2        | +1.4              | 6.4            | 6.8            | 4.0                  | 5.0              | 5.1              | 3.7                    |
| 2006/02    | 29.2        | +0.9              | 6.2            | 6.6            | 3.6                  | 4.3              | 4.8              | 3.3                    |
| 2006/03    | 28.3        | +0.7              | 5.0            | 5.7            | 3.6                  | 3.7              | 4.3              | 3.3                    |
| 2006/04    | 27.0        | +2.7              | 4.5            | 4.8            | 3.6                  | 3.6              | 3.9              | 3.3                    |
| 2006/05    | 26.5        | +3.0              | 4.7            | 4.5            | 3.4                  | 3.9              | 3.8              | 3.2                    |
| 2006/06    | 29.1        | +3.3              | 5.7            | 5.6            | 3.7                  | 4.7              | 4.7              | 3.5                    |
| 2006/07    | 29.2        | +5.2              | 6.0            | 5.3            | 4.0                  | 4.8              | 4.3              | 3.8                    |
| 2006/08    | 29.9        | +5.1              | 6.1            | 5.8            | 4.4                  | 5.0              | 4.7              | 4.2                    |
| 2006/09    | 32.9        | +4.6              | 6.7            | 6.6            | 4.9                  | 5.3              | 5.1              | 4.5                    |
| 2006/10    | 32.5        | +4.5              | 6.6            | 6.5            | 4.8                  | 5.5              | 5.4              | 4.5                    |
| 2006/11    | 31.3        | +5.1              | 7.1            | 6.5            | 4.7                  | 5.7              | 5.2              | 4.4                    |
| 2006/12    | 31.3        | +2.8              | 6.7            | 6.7            | 4.2                  | 5.0              | 5.2              | 3.9                    |

**Table S19.** Same as Table S1 for OMI vs. TES over SH jet ( $35^\circ \text{ S} < \text{Lat} \leq 25^\circ \text{ S}$ )

| Year/Month | $\mu_{TES}$ | $\mu_{(OMI-TES)}$ | $\sigma_{OMI}$ | $\sigma_{TES}$ | $\sigma_{(OMI-TES)}$ | $\sigma_{OMI}^*$ | $\sigma_{TES}^*$ | $\sigma_{(OMI-TES)}^*$ |
|------------|-------------|-------------------|----------------|----------------|----------------------|------------------|------------------|------------------------|
| 2005/01    | 30.4        | +2.7              | 4.1            | 6.7            | 4.9                  | 2.7              | 4.1              | 3.1                    |
| 2005/02    | 28.0        | +3.9              | 3.6            | 5.6            | 4.2                  | 2.3              | 3.2              | 2.5                    |
| 2005/03    | 26.7        | +3.6              | 3.8            | 4.6            | 3.7                  | 2.4              | 3.1              | 2.4                    |
| 2005/04    | 28.6        | +2.8              | 4.2            | 5.1            | 4.3                  | 1.7              | 2.4              | 2.0                    |
| 2005/05    | 27.7        | +2.4              | 4.7            | 4.4            | 4.7                  | 2.5              | 2.7              | 2.8                    |
| 2005/07    | 30.6        | +4.8              | 6.7            | 5.6            | 5.0                  | 5.4              | 4.4              | 4.3                    |
| 2005/08    | 30.6        | +5.3              | 6.6            | 6.3            | 5.5                  | 5.3              | 4.8              | 4.6                    |
| 2005/09    | 33.0        | +4.6              | 6.5            | 6.8            | 5.5                  | 4.3              | 4.5              | 4.2                    |
| 2005/10    | 34.6        | +5.1              | 6.8            | 7.1            | 5.1                  | 5.2              | 5.3              | 4.2                    |
| 2005/11    | 32.4        | +2.7              | 5.8            | 7.4            | 4.9                  | 4.2              | 5.1              | 3.6                    |
| 2005/12    | 30.8        | +3.8              | 5.2            | 6.8            | 4.6                  | 3.7              | 4.8              | 3.5                    |
| 2006/01    | 31.3        | +1.8              | 4.1            | 6.6            | 5.0                  | 3.2              | 4.6              | 3.8                    |
| 2006/02    | 29.5        | +2.6              | 3.8            | 6.4            | 4.9                  | 2.9              | 4.5              | 3.5                    |
| 2006/03    | 28.3        | +3.5              | 3.6            | 5.7            | 4.6                  | 2.6              | 4.1              | 3.3                    |
| 2006/04    | 26.8        | +3.9              | 3.8            | 4.7            | 4.2                  | 2.8              | 3.7              | 3.2                    |
| 2006/05    | 26.4        | +3.0              | 4.5            | 4.5            | 3.9                  | 3.7              | 3.6              | 3.4                    |
| 2006/06    | 29.0        | +2.3              | 6.1            | 5.6            | 4.5                  | 5.1              | 4.4              | 3.8                    |
| 2006/07    | 29.2        | +3.2              | 5.9            | 5.3            | 5.2                  | 4.5              | 4.0              | 4.1                    |
| 2006/08    | 29.8        | +3.6              | 6.4            | 5.5            | 5.1                  | 4.9              | 4.3              | 4.2                    |
| 2006/09    | 33.4        | +3.6              | 5.7            | 6.3            | 5.1                  | 4.0              | 4.3              | 3.8                    |
| 2006/10    | 32.6        | +4.1              | 5.4            | 6.4            | 5.4                  | 4.3              | 5.0              | 4.3                    |
| 2006/11    | 31.2        | +4.1              | 5.4            | 6.5            | 4.6                  | 4.2              | 5.1              | 3.7                    |
| 2006/12    | 31.1        | +3.1              | 4.6            | 6.6            | 5.1                  | 3.7              | 4.8              | 3.9                    |

**Table S20.** Same as Table S1 for OMI vs. TES\* over SH jet ( $35^\circ \text{ S} < \text{Lat} \leq 25^\circ \text{ S}$ )

| Year/Month | $\mu_{TES^*}$ | $\mu_{(OMI-TES^*)}$ | $\sigma_{OMI}$ | $\sigma_{TES^*}$ | $\sigma_{(OMI-TES^*)}$ | $\sigma_{OMI}^*$ | $\sigma_{TES^*}^*$ | $\sigma_{(OMI-TES^*)}^*$ |
|------------|---------------|---------------------|----------------|------------------|------------------------|------------------|--------------------|--------------------------|
| 2005/01    | 33.4          | -0.2 (-3.1)         | 4.1            | 6.1              | 4.5                    | 2.7              | 3.9                | 3.1                      |
| 2005/02    | 30.7          | +1.2 (-3.7)         | 3.6            | 5.1              | 4.0                    | 2.3              | 3.1                | 2.5                      |
| 2005/03    | 28.3          | +2.1 (-3.2)         | 3.8            | 4.4              | 3.7                    | 2.4              | 3.0                | 2.7                      |
| 2005/04    | 29.0          | +2.4 (-1.5)         | 4.2            | 4.8              | 4.3                    | 1.7              | 2.2                | 2.2                      |
| 2005/05    | 27.1          | +3.1 (-0.8)         | 4.7            | 4.0              | 4.5                    | 2.5              | 2.7                | 2.8                      |
| 2005/07    | 30.3          | +5.1 (+0.1)         | 6.7            | 5.3              | 5.1                    | 5.4              | 4.3                | 4.4                      |
| 2005/08    | 30.9          | +5.0 (-1.0)         | 6.6            | 5.9              | 5.6                    | 5.3              | 4.7                | 4.7                      |
| 2005/09    | 34.8          | +2.8 (-4.0)         | 6.5            | 6.6              | 5.6                    | 4.3              | 4.5                | 4.2                      |
| 2005/10    | 37.2          | +2.4 (-4.9)         | 6.8            | 6.5              | 5.0                    | 5.2              | 5.2                | 4.4                      |
| 2005/11    | 35.3          | -0.3 (-5.3)         | 5.8            | 6.9              | 4.6                    | 4.2              | 5.1                | 3.7                      |
| 2005/12    | 34.0          | +0.6 (-3.8)         | 5.2            | 6.2              | 4.3                    | 3.7              | 4.6                | 3.6                      |
| 2006/01    | 34.1          | -1.0 (-4.4)         | 4.1            | 6.1              | 4.9                    | 3.2              | 4.5                | 3.9                      |
| 2006/02    | 32.0          | +0.1 (-4.2)         | 3.8            | 5.9              | 4.5                    | 2.9              | 4.4                | 3.7                      |
| 2006/03    | 29.4          | +2.4 (-1.0)         | 3.6            | 5.3              | 4.4                    | 2.6              | 4.0                | 3.5                      |
| 2006/04    | 27.1          | +3.6 (+0.8)         | 3.8            | 4.5              | 4.2                    | 2.8              | 3.6                | 3.3                      |
| 2006/05    | 26.2          | +3.2 (-0.1)         | 4.5            | 4.2              | 3.8                    | 3.7              | 3.5                | 3.4                      |
| 2006/06    | 28.4          | +2.8 (+1.2)         | 6.1            | 5.3              | 4.5                    | 5.1              | 4.2                | 3.9                      |
| 2006/07    | 29.0          | +3.4 (+1.6)         | 5.9            | 5.0              | 5.2                    | 4.5              | 3.9                | 4.1                      |
| 2006/08    | 30.4          | +3.1 (-0.5)         | 6.4            | 5.2              | 5.3                    | 4.9              | 4.2                | 4.3                      |
| 2006/09    | 35.5          | +1.5 (-2.7)         | 5.7            | 6.2              | 5.3                    | 4.0              | 4.2                | 4.0                      |
| 2006/10    | 35.4          | +1.4 (-4.4)         | 5.4            | 6.3              | 5.7                    | 4.3              | 5.0                | 4.5                      |
| 2006/11    | 34.1          | +1.3 (-3.9)         | 5.4            | 6.1              | 4.6                    | 4.2              | 5.0                | 4.0                      |
| 2006/12    | 34.5          | -0.3 (-4.6)         | 4.6            | 5.9              | 4.7                    | 3.7              | 4.7                | 4.0                      |

**Table S21.** Same as Table S1 for SH mid-latitudes ( $60^\circ \text{ S} < \text{Lat} \leq 35^\circ \text{ S}$ )

| Year/Month | $\mu_{OMI}$ | $\mu_{(CTM-OMI)}$ | $\sigma_{CTM}$ | $\sigma_{OMI}$ | $\sigma_{(CTM-OMI)}$ | $\sigma_{CTM}^*$ | $\sigma_{OMI}^*$ | $\sigma_{(CTM-OMI)}^*$ |
|------------|-------------|-------------------|----------------|----------------|----------------------|------------------|------------------|------------------------|
| 2005/01    | 25.5        | +0.9              | 5.2            | 5.8            | 2.1                  | 3.4              | 4.4              | 2.1                    |
| 2005/02    | 25.7        | +0.5              | 4.8            | 5.3            | 2.0                  | 3.4              | 4.2              | 2.0                    |
| 2005/03    | 24.7        | +0.2              | 3.4            | 4.0            | 1.9                  | 2.8              | 3.6              | 1.8                    |
| 2005/04    | 25.6        | +0.0              | 3.6            | 4.5            | 2.2                  | 3.2              | 4.0              | 2.2                    |
| 2005/05    | 24.9        | +1.2              | 3.3            | 4.0            | 2.0                  | 3.0              | 3.4              | 1.9                    |
| 2005/06    | 25.2        | +2.6              | 3.6            | 3.8            | 1.9                  | 3.1              | 3.3              | 1.8                    |
| 2005/07    | 26.9        | +3.9              | 4.3            | 4.5            | 2.3                  | 3.9              | 4.1              | 2.2                    |
| 2005/08    | 29.4        | +4.8              | 4.8            | 5.3            | 3.5                  | 4.5              | 5.1              | 3.3                    |
| 2005/09    | 31.7        | +4.7              | 5.3            | 5.4            | 4.0                  | 4.3              | 5.0              | 3.5                    |
| 2005/10    | 31.2        | +5.3              | 5.6            | 5.5            | 3.6                  | 4.7              | 5.1              | 3.4                    |
| 2005/11    | 29.2        | +4.8              | 5.5            | 5.4            | 2.9                  | 4.4              | 4.7              | 2.8                    |
| 2005/12    | 27.7        | +3.7              | 5.0            | 5.3            | 2.4                  | 3.9              | 4.5              | 2.3                    |
| 2006/01    | 25.9        | +3.0              | 5.8            | 6.2            | 2.2                  | 3.8              | 4.5              | 2.1                    |
| 2006/02    | 25.2        | +2.5              | 4.6            | 5.0            | 2.0                  | 3.2              | 3.7              | 1.9                    |
| 2006/03    | 25.3        | +1.3              | 4.0            | 5.0            | 2.2                  | 3.4              | 4.2              | 2.1                    |
| 2006/04    | 25.2        | +1.5              | 3.7            | 4.5            | 2.2                  | 3.3              | 4.0              | 2.1                    |
| 2006/05    | 25.2        | +2.7              | 3.5            | 3.9            | 2.0                  | 3.2              | 3.4              | 1.9                    |
| 2006/06    | 25.1        | +3.7              | 4.0            | 4.3            | 2.1                  | 3.6              | 3.7              | 2.0                    |
| 2006/07    | 26.6        | +4.6              | 4.3            | 4.4            | 2.4                  | 4.1              | 4.1              | 2.3                    |
| 2006/08    | 28.7        | +5.2              | 4.4            | 5.2            | 2.9                  | 4.2              | 5.0              | 2.8                    |
| 2006/09    | 30.9        | +5.0              | 4.6            | 5.2            | 3.2                  | 4.2              | 5.1              | 3.0                    |
| 2006/10    | 30.5        | +5.0              | 5.5            | 5.7            | 3.2                  | 4.5              | 5.3              | 3.0                    |
| 2006/11    | 28.4        | +4.5              | 5.4            | 5.2            | 2.8                  | 4.1              | 4.5              | 2.6                    |
| 2006/12    | 27.0        | +3.8              | 5.6            | 5.5            | 2.6                  | 3.8              | 4.4              | 2.4                    |

**Table S22.** Same as Table S1 for CTM vs. TES over SH mid-latitudes ( $60^\circ \text{ S} < \text{Lat} \leq 35^\circ \text{ S}$ )

| Year/Month | $\mu_{TES}$ | $\mu_{(CTM-TES)}$ | $\sigma_{CTM}$ | $\sigma_{TES}$ | $\sigma_{(CTM-TES)}$ | $\sigma_{CTM}^*$ | $\sigma_{TES}^*$ | $\sigma_{(CTM-TES)}^*$ |
|------------|-------------|-------------------|----------------|----------------|----------------------|------------------|------------------|------------------------|
| 2005/01    | 21.3        | +0.3              | 5.3            | 5.7            | 2.9                  | 3.4              | 3.9              | 2.6                    |
| 2005/02    | 21.6        | -0.2              | 5.0            | 5.5            | 3.1                  | 3.5              | 4.0              | 2.7                    |
| 2005/03    | 21.4        | -0.3              | 3.5            | 4.1            | 2.8                  | 2.6              | 3.2              | 2.5                    |
| 2005/04    | 23.1        | -0.3              | 3.4            | 4.2            | 2.8                  | 2.0              | 2.7              | 2.2                    |
| 2005/05    | 24.9        | -0.4              | 2.5            | 3.4            | 3.1                  | 1.7              | 2.7              | 2.6                    |
| 2005/07    | 27.3        | +0.7              | 3.1            | 3.8            | 4.1                  | 2.5              | 3.5              | 3.8                    |
| 2005/08    | 27.6        | +1.4              | 3.0            | 3.9            | 4.2                  | 2.5              | 3.6              | 3.9                    |
| 2005/09    | 28.0        | +1.8              | 3.6            | 4.2            | 4.2                  | 2.3              | 3.3              | 3.5                    |
| 2005/10    | 26.4        | +2.3              | 4.2            | 4.2            | 3.9                  | 2.9              | 3.6              | 3.6                    |
| 2005/11    | 23.7        | +2.3              | 4.6            | 4.3            | 3.4                  | 3.0              | 3.3              | 3.1                    |
| 2005/12    | 21.4        | +1.8              | 4.6            | 4.6            | 3.1                  | 2.9              | 3.3              | 2.9                    |
| 2006/01    | 21.9        | +1.4              | 6.1            | 6.3            | 3.0                  | 4.0              | 4.3              | 2.8                    |
| 2006/02    | 21.2        | +1.0              | 5.1            | 5.4            | 2.8                  | 3.5              | 3.8              | 2.6                    |
| 2006/03    | 22.4        | +0.7              | 4.4            | 5.2            | 3.0                  | 3.3              | 3.9              | 2.8                    |
| 2006/04    | 22.6        | +1.9              | 3.5            | 3.9            | 2.8                  | 2.8              | 3.3              | 2.7                    |
| 2006/05    | 24.0        | +2.5              | 2.7            | 3.4            | 3.1                  | 2.2              | 3.1              | 3.0                    |
| 2006/06    | 25.4        | +3.0              | 3.0            | 3.5            | 3.4                  | 2.5              | 3.3              | 3.2                    |
| 2006/07    | 26.8        | +3.5              | 3.0            | 3.7            | 3.7                  | 2.6              | 3.5              | 3.5                    |
| 2006/08    | 27.6        | +3.3              | 2.9            | 3.8            | 3.9                  | 2.5              | 3.6              | 3.7                    |
| 2006/09    | 28.1        | +3.1              | 3.8            | 4.2            | 4.1                  | 2.7              | 3.6              | 3.6                    |
| 2006/10    | 26.2        | +3.1              | 4.5            | 4.5            | 3.8                  | 3.3              | 3.8              | 3.5                    |
| 2006/11    | 22.5        | +3.7              | 4.7            | 4.2            | 3.3                  | 3.0              | 3.1              | 3.0                    |
| 2006/12    | 21.1        | +2.7              | 5.0            | 4.9            | 3.0                  | 3.1              | 3.4              | 2.8                    |

**Table S23.** Same as Table S1 for OMI vs. TES over SH mid-latitudes ( $60^\circ \text{ S} < \text{Lat} \leq 35^\circ \text{ S}$ )

| Year/Month | $\mu_{TES}$ | $\mu_{(OMI-TES)}$ | $\sigma_{OMI}$ | $\sigma_{TES}$ | $\sigma_{(OMI-TES)}$ | $\sigma_{OMI}^*$ | $\sigma_{TES}^*$ | $\sigma_{(OMI-TES)}^*$ |
|------------|-------------|-------------------|----------------|----------------|----------------------|------------------|------------------|------------------------|
| 2005/01    | 21.1        | +3.6              | 5.2            | 5.6            | 3.4                  | 3.3              | 3.3              | 2.5                    |
| 2005/02    | 21.5        | +3.4              | 4.9            | 5.6            | 3.2                  | 3.0              | 3.4              | 2.3                    |
| 2005/03    | 21.5        | +2.6              | 3.5            | 4.0            | 3.2                  | 2.7              | 2.7              | 2.4                    |
| 2005/04    | 22.9        | +2.1              | 3.7            | 4.0            | 3.2                  | 2.0              | 1.9              | 1.5                    |
| 2005/05    | 24.9        | +0.2              | 3.7            | 3.4            | 3.7                  | 2.0              | 2.5              | 2.4                    |
| 2005/07    | 27.3        | +0.3              | 4.6            | 3.8            | 4.6                  | 3.6              | 3.4              | 3.9                    |
| 2005/08    | 27.8        | +2.4              | 5.0            | 3.8            | 5.2                  | 4.2              | 3.5              | 4.5                    |
| 2005/09    | 28.1        | +4.0              | 4.8            | 4.3            | 4.8                  | 2.9              | 3.0              | 3.4                    |
| 2005/10    | 26.5        | +4.8              | 5.0            | 4.3            | 4.9                  | 4.1              | 3.5              | 4.3                    |
| 2005/11    | 23.6        | +4.4              | 4.8            | 4.3            | 4.7                  | 3.6              | 3.1              | 3.7                    |
| 2005/12    | 21.5        | +5.3              | 4.6            | 4.7            | 3.8                  | 3.4              | 3.1              | 3.2                    |
| 2006/01    | 21.8        | +3.7              | 5.6            | 6.3            | 3.5                  | 3.9              | 4.1              | 2.9                    |
| 2006/02    | 21.2        | +3.8              | 4.8            | 5.5            | 3.1                  | 3.2              | 3.5              | 2.5                    |
| 2006/03    | 22.5        | +2.1              | 4.5            | 5.3            | 3.4                  | 3.5              | 3.7              | 2.8                    |
| 2006/04    | 22.6        | +2.2              | 3.9            | 3.9            | 3.5                  | 3.1              | 3.2              | 3.0                    |
| 2006/05    | 24.0        | +1.3              | 3.7            | 3.3            | 3.8                  | 2.9              | 3.0              | 3.2                    |
| 2006/06    | 25.4        | -0.1              | 4.1            | 3.6            | 4.0                  | 3.1              | 3.1              | 3.3                    |
| 2006/07    | 26.9        | -0.0              | 4.4            | 3.8            | 4.6                  | 3.6              | 3.4              | 3.9                    |
| 2006/08    | 27.7        | +1.4              | 5.2            | 3.8            | 5.4                  | 4.5              | 3.4              | 4.6                    |
| 2006/09    | 28.1        | +2.4              | 4.6            | 4.3            | 4.9                  | 3.7              | 3.4              | 4.0                    |
| 2006/10    | 26.3        | +3.8              | 5.2            | 4.5            | 4.9                  | 4.2              | 3.7              | 4.3                    |
| 2006/11    | 22.6        | +5.0              | 4.7            | 4.3            | 4.1                  | 3.6              | 3.0              | 3.4                    |
| 2006/12    | 21.2        | +5.3              | 5.0            | 5.1            | 4.0                  | 3.8              | 3.3              | 3.3                    |



**Table S24.** Same as Table S1 for OMI vs. TES\* over SH mid-latitudes ( $60^\circ \text{ S} < \text{Lat} \leq 35^\circ \text{ S}$ )

| Year/Month | $\mu_{TES^*}$ | $\mu_{(OMI-TES^*)}$ | $\sigma_{OMI}$ | $\sigma_{TES^*}$ | $\sigma_{(OMI-TES^*)}$ | $\sigma_{OMI}^*$ | $\sigma_{TES^*}^*$ | $\sigma_{(OMI-TES^*)}^*$ |
|------------|---------------|---------------------|----------------|------------------|------------------------|------------------|--------------------|--------------------------|
| 2005/01    | 24.4          | +0.4 (-1.5)         | 5.2            | 5.2              | 3.6                    | 3.3              | 3.1                | 2.7                      |
| 2005/02    | 24.2          | +0.7 (-1.5)         | 4.9            | 5.1              | 3.5                    | 3.0              | 3.1                | 2.6                      |
| 2005/03    | 22.9          | +1.2 (-1.4)         | 3.5            | 3.6              | 3.4                    | 2.7              | 2.6                | 2.8                      |
| 2005/04    | 23.2          | +1.8 (-1.1)         | 3.7            | 3.5              | 3.3                    | 2.0              | 1.8                | 1.6                      |
| 2005/05    | 24.8          | +0.3 (-1.8)         | 3.7            | 3.2              | 4.2                    | 2.0              | 2.4                | 2.5                      |
| 2005/07    | 26.9          | +0.7 (-2.9)         | 4.6            | 3.8              | 4.7                    | 3.6              | 3.4                | 3.9                      |
| 2005/08    | 28.1          | +2.0 (-2.8)         | 5.0            | 3.9              | 4.9                    | 4.2              | 3.6                | 4.3                      |
| 2005/09    | 29.2          | +2.9 (-2.3)         | 4.8            | 4.3              | 4.5                    | 2.9              | 3.1                | 3.2                      |
| 2005/10    | 29.5          | +1.8 (-3.5)         | 5.0            | 4.4              | 4.7                    | 4.1              | 3.8                | 4.2                      |
| 2005/11    | 27.1          | +1.0 (-3.5)         | 4.8            | 4.4              | 4.5                    | 3.6              | 3.5                | 3.6                      |
| 2005/12    | 25.3          | +1.5 (-2.9)         | 4.6            | 4.7              | 3.7                    | 3.4              | 3.4                | 3.2                      |
| 2006/01    | 24.8          | +0.6 (-2.3)         | 5.6            | 5.9              | 3.7                    | 3.9              | 3.9                | 3.2                      |
| 2006/02    | 23.9          | +1.1 (-2.0)         | 4.8            | 4.9              | 3.4                    | 3.2              | 3.3                | 2.9                      |
| 2006/03    | 23.7          | +0.9 (-1.5)         | 4.5            | 4.6              | 3.6                    | 3.5              | 3.4                | 3.2                      |
| 2006/04    | 23.1          | +1.8 (-0.2)         | 3.9            | 3.5              | 3.7                    | 3.1              | 3.0                | 3.2                      |
| 2006/05    | 23.8          | +1.6 (-0.3)         | 3.7            | 3.1              | 4.1                    | 2.9              | 2.9                | 3.3                      |
| 2006/06    | 24.9          | +0.4 (-0.5)         | 4.1            | 3.4              | 4.1                    | 3.1              | 3.1                | 3.3                      |
| 2006/07    | 26.6          | +0.3 (-1.0)         | 4.4            | 3.8              | 4.5                    | 3.6              | 3.4                | 3.8                      |
| 2006/08    | 28.0          | +1.1 (-2.0)         | 5.2            | 4.0              | 5.0                    | 4.5              | 3.6                | 4.3                      |
| 2006/09    | 29.3          | +1.2 (-2.6)         | 4.6            | 4.4              | 4.5                    | 3.7              | 3.5                | 3.7                      |
| 2006/10    | 28.9          | +1.2 (-2.8)         | 5.2            | 4.5              | 4.6                    | 4.2              | 3.9                | 4.1                      |
| 2006/11    | 25.8          | +1.7 (-1.8)         | 4.7            | 4.3              | 3.9                    | 3.6              | 3.4                | 3.3                      |
| 2006/12    | 25.0          | +1.4 (-1.9)         | 5.0            | 5.0              | 3.8                    | 3.8              | 3.6                | 3.4                      |
